# Supplementary material
Source: publisher figshare collection journal article supplement (https://acs.figshare.com/articles/dataset/_/11962317)
Supplement: Supplementary file 1 [file 21962718]

## Supporting Information

# Impact of Surface Modification on the Li, Na, and K Intercalation Efficiency and Capacity of Few-Layer Graphene Electrodes

A. Nijamudheen,<sup>§,1</sup> Dipobrato Sarbapalli,<sup>¶,†</sup> Jingshu Hui,<sup>¶</sup> Joaquín Rodríguez-López<sup>\*¶</sup>, and Jose L. Mendoza-Cortes<sup>\*,§,1,‡</sup>

<sup>§</sup> Department of Chemical & Biomedical Engineering, Florida A&M-Florida State University, Joint College of Engineering, 2525 Pottsdamer Street, Tallahassee, FL 32310.

<sup>1</sup> Department of Scientific Computing, Materials Science and Engineering, High Performance Materials Institute, Condensed Matter Theory - National High Magnetic Field Laboratory (NHMFL), Florida State University, 1800 East Paul Dirac Drive, Tallahassee, FL 32310.

<sup>¶</sup> Department of Chemistry, University of Illinois at Urbana–Champaign, 600 South Mathews Avenue, Urbana, Illinois 61801.

<sup>†</sup> Department of Materials Science and Engineering, University of Illinois at Urbana–Champaign, 1304 W Green St, Urbana, IL 61801.

<sup>‡</sup> Department of Physics, College of Arts and Science, Florida State University, 77 Chieftan Way, Tallahassee, FL 32306.

\* Email: [joaquinr@illinois.edu](mailto:joaquinr@illinois.edu), [mendoza@eng.famu.fsu.edu](mailto:mendoza@eng.famu.fsu.edu)

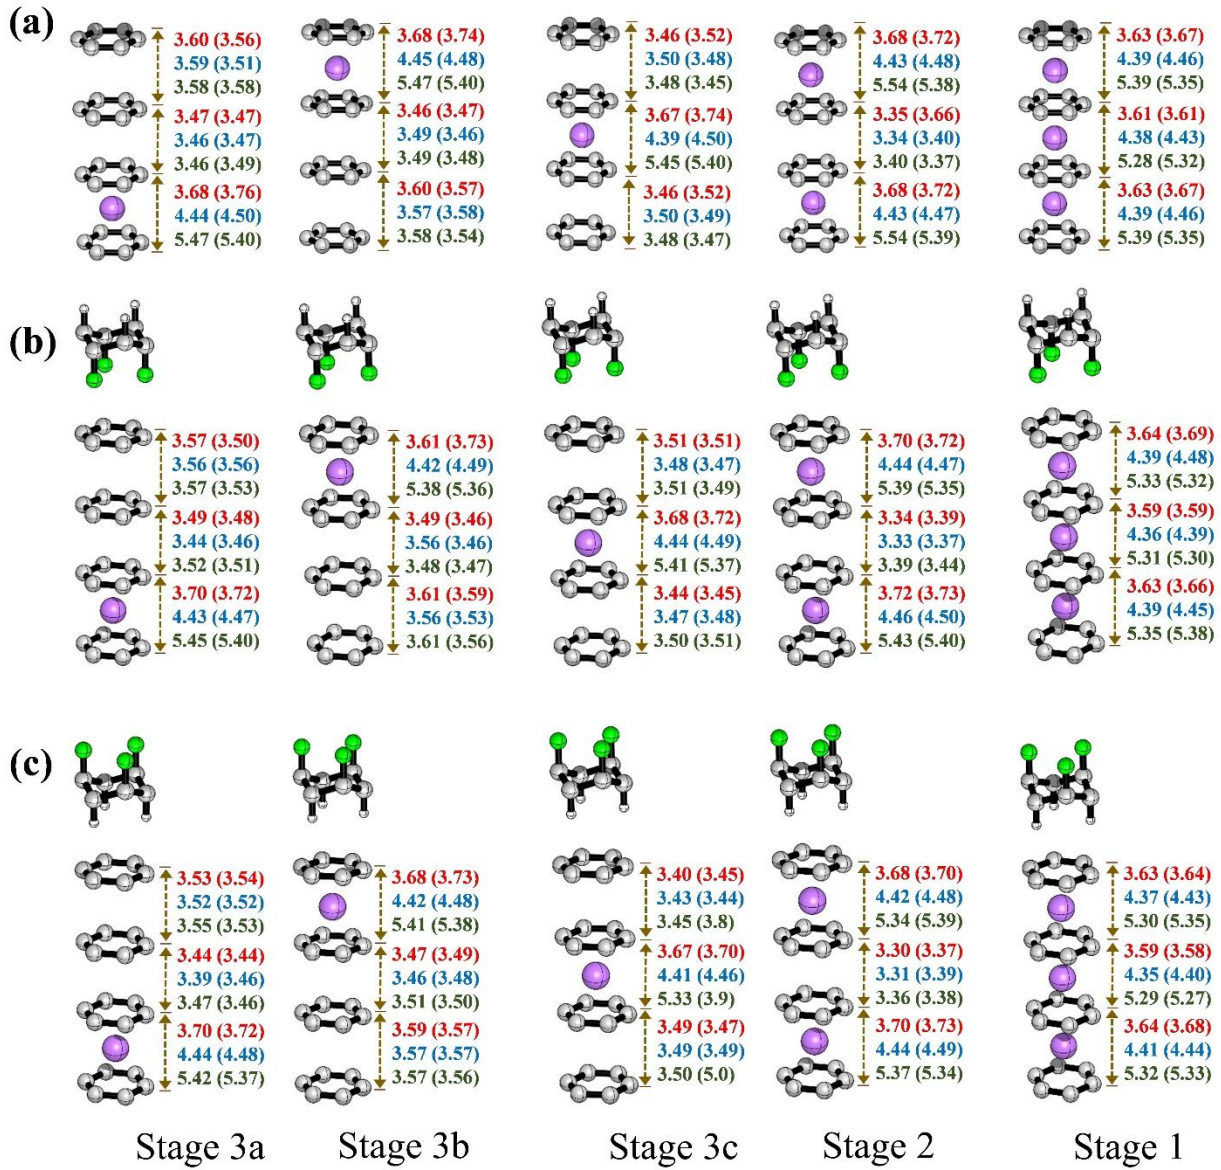

**Figure S1.** Interlayer stacking distances (in Å) in metal intercalated 4LG during different stages: (a) no surface modifier, and in the presence of (b) negative and (c) positive surface modifiers. The values outside parenthesis correspond to  $C_6M$  models, whereas the values inside parenthesis represent those obtained for  $C_8M$  models described in Figure 1c:  $C_6M$  values ( $C_8M$  values). Different label color codes represent the intercalated metals distance: **red**, Li; **blue**, Na; and **green**, K.

**Table S1.** Thermodynamics for  $M$  intercalation within a 4LG either in the presence or absence of a 2D-C<sub>2</sub>HF SM. Binding energy with respect to the intercalation of different metals while using C<sub>6</sub>M-type models are presented. The values presented outside and inside of parenthesis represent the BE for  $M$  intercalation in the presence or absence of a SM, respectively.

| System             | Binding energy (BE) per metal atom (in eV)                        |                |                  |                                                                   |                |                  |
|--------------------|-------------------------------------------------------------------|----------------|------------------|-------------------------------------------------------------------|----------------|------------------|
|                    | Positive modifier, 2D-C <sub>2</sub> HF<br>(no SM = pristine 4LG) |                |                  | Negative modifier, 2D-C <sub>2</sub> HF<br>(no SM = pristine 4LG) |                |                  |
| Intercalated metal | Li                                                                | Na             | K                | Li                                                                | Na             | K                |
| Stage 3a           | -0.17<br>(-0.09)                                                  | 0.11<br>(0.20) | -0.04<br>(0.04)  | -0.14<br>(-0.09)                                                  | 0.14<br>(0.20) | -0.01<br>(0.04)  |
| Stage 3b           | -0.11<br>(-0.09)                                                  | 0.16<br>(0.20) | 0.02<br>(0.04)   | -0.23<br>(0.09)                                                   | 0.04<br>(0.20) | -0.10<br>(0.04)  |
| Stage 3c           | -0.16<br>(-0.11)                                                  | 0.11<br>(0.19) | -0.02<br>(0.04)  | -0.18<br>(-0.11)                                                  | 0.09<br>(0.19) | -0.04<br>(0.04)  |
| Stage 2            | -0.14<br>(-0.09)                                                  | 0.12<br>(0.18) | -0.02<br>(0.03)  | -0.19<br>(-0.09)                                                  | 0.08<br>(0.18) | -0.06<br>(0.03)  |
| Stage 1            | -0.25<br>(-0.20)                                                  | 0.06<br>(0.11) | -0.18<br>(-0.08) | -0.28<br>(-0.20)                                                  | 0.03<br>(0.11) | -0.15<br>(-0.08) |

**Table S2.** Thermodynamics for  $M$  intercalation within a 4LG either in the presence or absence of a 2D-C<sub>2</sub>HF SM. Binding energy with respect to the intercalation of different metals while using C<sub>8</sub>M-type models are presented. The values presented outside and inside of parenthesis represent the BE for  $M$  intercalation in the presence or absence of a SM, respectively.

| System             | Binding energy (BE) per metal atom (in eV)               |                 |                  |                                                          |                 |                  |
|--------------------|----------------------------------------------------------|-----------------|------------------|----------------------------------------------------------|-----------------|------------------|
|                    | Positive modifier, 2D-C <sub>2</sub> HF<br>(no modifier) |                 |                  | Negative modifier, 2D-C <sub>2</sub> HF<br>(no modifier) |                 |                  |
| Intercalated metal | Li                                                       | Na              | K                | Li                                                       | Na              | K                |
| Stage 3a           | -0.24<br>(-0.17)                                         | -0.03<br>(0.07) | -0.20<br>(-0.10) | -0.19<br>(-0.17)                                         | 0.02<br>(0.07)  | -0.14<br>(-0.10) |
| Stage 3b           | -0.17<br>(-0.17)                                         | 0.05<br>(0.06)  | -0.11<br>(-0.10) | -0.32<br>(-0.17)                                         | -0.11<br>(0.06) | -0.28<br>(-0.10) |
| Stage 3c           | -0.23<br>(-0.18)                                         | -0.01<br>(0.05) | -0.17<br>(-0.10) | -0.24<br>(-0.18)                                         | -0.03<br>(0.05) | -0.19<br>(-0.10) |
| Stage 2            | -0.19<br>(-0.15)                                         | 0.02<br>(0.07)  | -0.16<br>(-0.10) | -0.24<br>(-0.15)                                         | -0.04<br>(0.07) | -0.22<br>(-0.10) |
| Stage 1            | -0.26<br>(-0.22)                                         | -0.01<br>(0.06) | -0.33<br>(-0.17) | -0.29<br>(-0.22)                                         | -0.06<br>(0.06) | -0.26<br>(-0.17) |

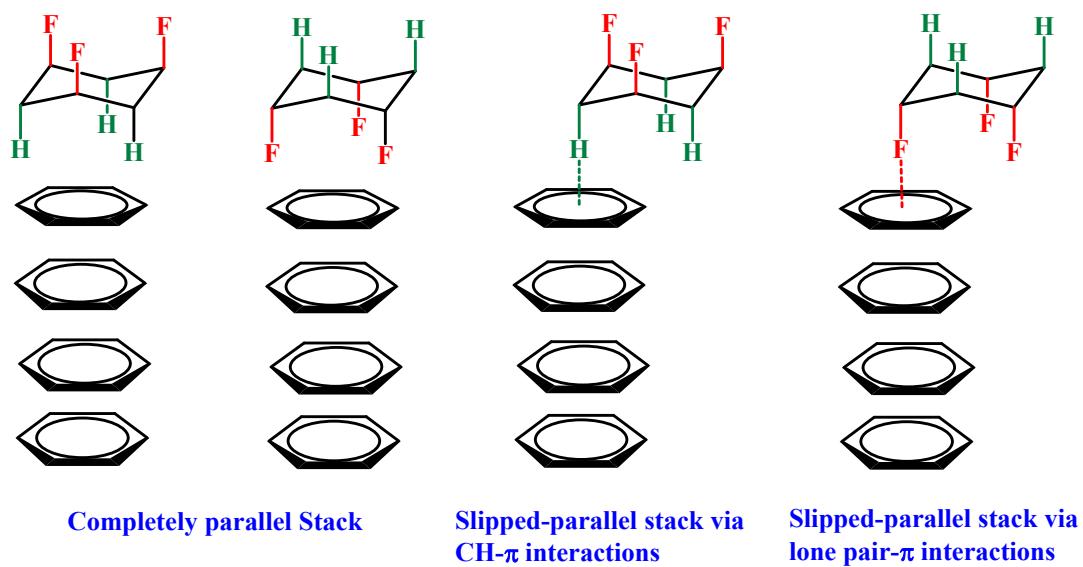

**Figure S2.** Schematic representation of different stacking arrangements of 4LG with the 2D SM layers.

**Table S3.** Thermodynamics for metal intercalation in 4LG modified by SM via different stacking arrangements shown in Figure S2. Binding energies calculated for  $M$ -4LG (both  $C_6M$  and  $C_8M$  type models), in which SM is stacked in either a complete-parallel (value outside parenthesis) or slipped-parallel (value inside parenthesis) stack conformation with  $M$ -4LG.

| System                  | Binding energy (BE) per $M$ atom (in eV)     |                  |                  |                                              |                  |                  |
|-------------------------|----------------------------------------------|------------------|------------------|----------------------------------------------|------------------|------------------|
|                         | Positive modifier, SM = 2D-C <sub>2</sub> HF |                  |                  | Negative modifier, SM = 2D-C <sub>2</sub> HF |                  |                  |
| Intercalated metal      | Li                                           | Na               | K                | Li                                           | Na               | K                |
| Stage 1 of $C_6M$ model | -0.25<br>(-0.24)                             | 0.06<br>(0.05)   | -0.18<br>(-0.18) | -0.28<br>(-0.28)                             | 0.03<br>(0.03)   | -0.15<br>(-0.15) |
| Stage 1 of $C_8M$ model | -0.26<br>(-0.27)                             | -0.01<br>(-0.02) | -0.33<br>(-0.33) | -0.29<br>(-0.30)                             | -0.06<br>(-0.06) | -0.26<br>(-0.26) |

**Table S4.** Calculated binding energies for the  $M$  intercalation in 4LG either in the presence or absence of a 2D-C<sub>2</sub>F surface modifier. The values presented outside and inside of parenthesis represent the BE for  $M$  intercalation in the presence or absence of a SM, respectively.

| System             | Binding energy (BE) per metal atom (in eV)             |                 |                  |                                                        |                 |                  |
|--------------------|--------------------------------------------------------|-----------------|------------------|--------------------------------------------------------|-----------------|------------------|
|                    | C <sub>6</sub> M-type models                           |                 |                  | C <sub>8</sub> M-type models                           |                 |                  |
|                    | with SM, 2D-C <sub>2</sub> F<br>(no SM = pristine 4LG) |                 |                  | with SM, 2D-C <sub>2</sub> F<br>(no SM = pristine 4LG) |                 |                  |
| Intercalated metal | Li                                                     | Na              | K                | Li                                                     | Na              | K                |
| Stage 3a           | -0.17<br>(-0.09)                                       | 0.10<br>(0.20)  | -0.05<br>(0.04)  | -0.25<br>(-0.17)                                       | -0.04<br>(0.07) | -0.21<br>(-0.10) |
| Stage 3b           | -0.27<br>(-0.09)                                       | -0.09<br>(0.20) | -0.14<br>(0.04)  | -0.34<br>(-0.17)                                       | -0.15<br>(0.06) | -0.31<br>(-0.10) |
| Stage 3c           | -0.18<br>(-0.11)                                       | 0.10<br>(0.19)  | -0.04<br>(0.04)  | -0.25<br>(-0.18)                                       | -0.04<br>(0.05) | -0.20<br>(-0.10) |
| Stage 2            | -0.22<br>(-0.09)                                       | 0.03<br>(0.18)  | -0.10<br>(0.03)  | -0.27<br>(-0.15)                                       | -0.08<br>(0.07) | -0.24<br>(-0.10) |
| Stage 1            | -0.29<br>(-0.20)                                       | 0.0<br>(0.11)   | -0.18<br>(-0.08) | -0.31<br>(-0.22)                                       | -0.07<br>(0.06) | -0.42<br>(-0.17) |

**Table S5.** Energy decomposition analyses of stage 1 structures of *M*-4LG and SM-*M*-4LG based on a distortion-interaction model (SM = 2D-C<sub>2</sub>F). BE, E<sub>coh</sub>, E<sub>dis</sub>, and E<sub>int</sub> represent the binding energy/atom, cohesive energy, distortion energy, and interaction energy, respectively.

| <b>System</b>                           | <b>BE (eV)</b> | <b>E<sub>coh</sub> (eV)</b> | <b>E<sub>dis</sub> (eV)</b> | <b>E<sub>int</sub> (eV)</b> |
|-----------------------------------------|----------------|-----------------------------|-----------------------------|-----------------------------|
| C <sub>6</sub> Li                       | -0.20          | 1.63                        | 0.03                        | -1.86                       |
| C <sub>8</sub> Li                       | -0.22          | 1.63                        | 0.04                        | -1.88                       |
| 2D-C <sub>2</sub> F...C <sub>6</sub> Li | -0.29          | 1.63                        | 0.03                        | -1.96                       |
| 2D-C <sub>2</sub> F...C <sub>8</sub> Li | -0.31          | 1.63                        | 0.04                        | -1.98                       |
| C <sub>6</sub> Na                       | 0.11           | 1.113                       | 0.13                        | -1.14                       |
| C <sub>8</sub> Na                       | 0.06           | 1.113                       | 0.17                        | -1.24                       |
| 2D-C <sub>2</sub> F...C <sub>6</sub> Na | 0.00           | 1.113                       | 0.14                        | -1.25                       |
| 2D-C <sub>2</sub> F...C <sub>8</sub> Na | -0.07          | 1.113                       | 0.17                        | -1.36                       |
| C <sub>6</sub> K                        | -0.08          | 0.93                        | 0.21                        | -1.22                       |
| C <sub>8</sub> K                        | -0.17          | 0.93                        | 0.27                        | -1.36                       |
| 2D-C <sub>2</sub> F...C <sub>6</sub> K  | -0.18          | 0.93                        | 0.22                        | -1.33                       |
| 2D-C <sub>2</sub> F...C <sub>8</sub> K  | -0.42          | 0.93                        | 0.28                        | -1.62                       |



**Table S6.** Energy decomposition analyses of stage 0 structures of *M*-4LG and SM-*M*-4LG based on a distortion-interaction model (SM = 2D-C<sub>2</sub>F). BE, E<sub>coh</sub>, E<sub>dis</sub>, and E<sub>int</sub> represent the binding energy/atom, cohesive energy, distortion energy, and interaction energy, respectively. **Stage 0 structures**

| System                                  | BE (eV) | E <sub>coh</sub> (eV) | E <sub>dist</sub> (eV) | E <sub>int</sub> (eV) |
|-----------------------------------------|---------|-----------------------|------------------------|-----------------------|
| C <sub>6</sub> Li                       | 0.05    | 1.63                  | 0.03                   | -1.61                 |
| C <sub>8</sub> Li                       | 0.10    | 1.63                  | 0.04                   | -1.57                 |
| 2D-C <sub>2</sub> F...C <sub>6</sub> Li | -0.35   | 1.63                  | 0.05                   | -2.04                 |
| 2D-C <sub>2</sub> F...C <sub>8</sub> Li | -0.33   | 1.63                  | 0.07                   | -2.03                 |
| C <sub>6</sub> Na                       | 0.12    | 1.113                 | 0.09                   | -1.08                 |
| C <sub>8</sub> Na                       | 0.18    | 1.113                 | 0.11                   | -1.04                 |
| 2D-C <sub>2</sub> F...C <sub>6</sub> Na | -0.17   | 1.113                 | 1.69                   | -2.97                 |
| 2D-C <sub>2</sub> F...C <sub>8</sub> Na | -0.20   | 1.113                 | 0.17                   | -1.48                 |
| C <sub>6</sub> K                        | -0.09   | 0.93                  | 0.14                   | -1.16                 |
| C <sub>8</sub> K                        | -0.15   | 0.93                  | 0.17                   | -1.24                 |
| 2D-C <sub>2</sub> F...C <sub>6</sub> K  | -0.38   | 0.93                  | 0.19                   | -1.50                 |
| 2D-C <sub>2</sub> F...C <sub>8</sub> K  | -0.42   | 0.93                  | 2.26                   | -3.61                 |

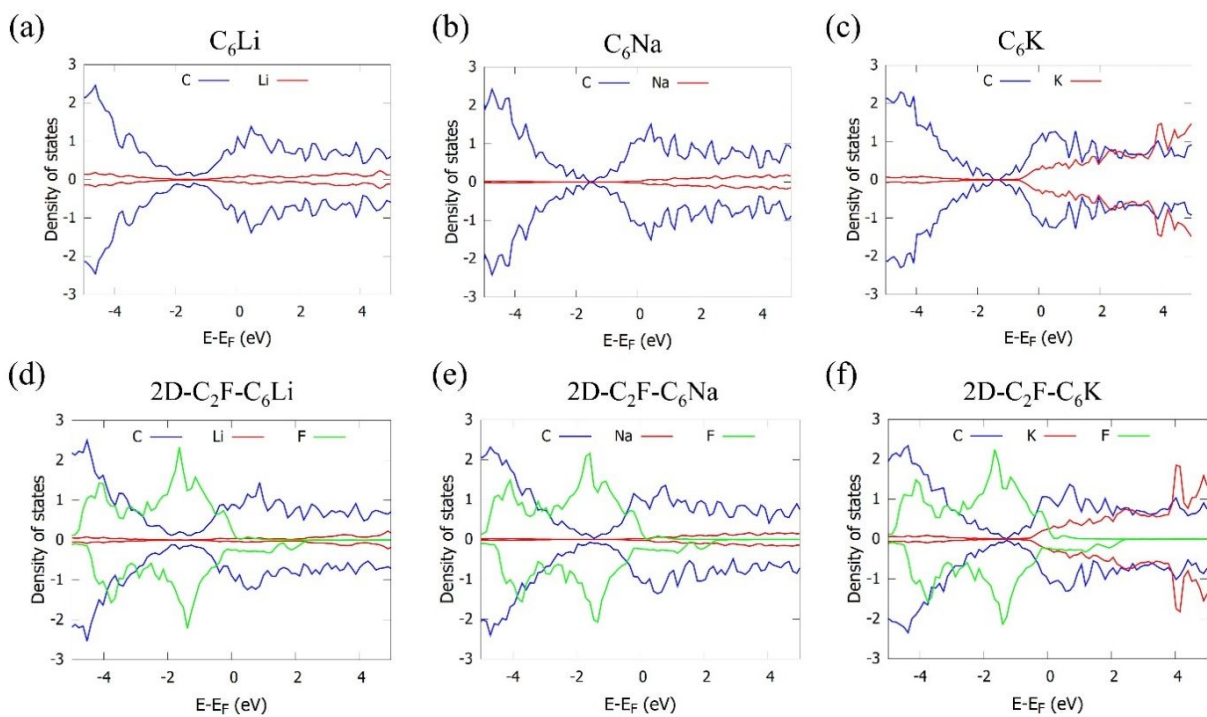

**Figure S3.** Calculated density of states for the stage 1 of different  $M$  intercalated 4LG and SM-4LG (SM = 2D-C<sub>2</sub>F) systems.; (a) C<sub>6</sub>Li, (b) C<sub>6</sub>Na, (c) C<sub>6</sub>K, (d) 2D-C<sub>2</sub>F-Li, (e) 2D-C<sub>2</sub>F-Na, and (f) 2D-C<sub>2</sub>F-K. DOSs for C<sub>6</sub> $M$ -type configurations are presented.
